# Supplementary material for: Pre-Birth Household Challenges Predict Future Child’s School Readiness and Academic Achievement
Source: MDPI journal article supplement (doi:10.3390/children9030414), 2022-03-15
Supplement: s1 [file s1]

Table S3. Independent Associations of Pre-Birth Household Challenge Components 12 Months Before Birth of 3-Year-Old Child with Child's Average School Attendance

| Pre-Birth Household Challenges                  | $\geq 90\%^*$<br>( <i>N</i> ) | < 90% ( <i>N</i> ) | < 90% Weighted<br>Mean (95% CI) | Risk Ratio<br>(95% CI) |
|-------------------------------------------------|-------------------------------|--------------------|---------------------------------|------------------------|
| <b>Moving to a New Address</b>                  |                               |                    |                                 |                        |
| Yes                                             | 644                           | 234                | 0.23 (0.20, 0.27)               | 1.16 (0.98, 1.38)      |
| No                                              | 1,317                         | 448                | 0.20 (0.18, 0.22)               | Referent               |
| <b>Someone Close Had Drug or Drinking Issue</b> |                               |                    |                                 |                        |
| Yes                                             | 357                           | 172                | 0.30 (0.25, 0.34)               | 1.54 (1.29, 1.85)      |
| No                                              | 1,604                         | 509                | 0.19 (0.17, 0.21)               | Referent               |
| <b>Can't Pay Bills</b>                          |                               |                    |                                 |                        |
| Yes                                             | 397                           | 136                | 0.22 (0.18, 0.26)               | 1.05 (0.85, 1.29)      |
| No                                              | 1,560                         | 543                | 0.21 (0.19, 0.23)               | Referent               |
| <b>Mom Lost Job</b>                             |                               |                    |                                 |                        |
| Yes                                             | 166                           | 60                 | 0.22 (0.16, 0.29)               | 1.06 (0.78, 1.45)      |
| No                                              | 1,781                         | 618                | 0.21 (0.19, 0.23)               | Referent               |
| <b>Partner Lost Job</b>                         |                               |                    |                                 |                        |
| Yes                                             | 217                           | 61                 | 0.20 (0.14, 0.26)               | 0.94 (0.70, 1.27)      |
| No                                              | 1,738                         | 614                | 0.21 (0.19, 0.23)               | Referent               |
| <b>Mental Health Check or Treatment</b>         |                               |                    |                                 |                        |
| Yes                                             | 181                           | 68                 | 0.25 (0.18, 0.32)               | 1.18 (0.89, 1.56)      |
| No                                              | 1,791                         | 624                | 0.21 (0.19, 0.23)               | Referent               |
| <b>Homeless</b>                                 |                               |                    |                                 |                        |
| Yes                                             | 73                            | 44                 | 0.38 (0.27, 0.50)               | 1.87 (1.36, 2.56)      |
| No                                              | 1,888                         | 636                | 0.20 (0.19, 0.22)               | Referent               |
| <b>Birthing Parent or Partner in Jail</b>       |                               |                    |                                 |                        |
| Yes                                             | 103                           | 56                 | 0.33 (0.24, 0.42)               | 1.60 (1.21, 2.13)      |
| No                                              | 1,853                         | 624                | 0.21 (0.19, 0.22)               | Referent               |
| <b>Divorce or Separation</b>                    |                               |                    |                                 |                        |
| Yes                                             | 155                           | 69                 | 0.29 (0.22, 0.37)               | 1.44 (1.11, 1.88)      |
| No                                              | 1,805                         | 610                | 0.20 (0.19, 0.22)               | Referent               |
| <b>Death in Family</b>                          |                               |                    |                                 |                        |
| Yes                                             | 332                           | 167                | 0.29 (0.25, 0.34)               | 1.51 (1.26, 1.82)      |
| No                                              | 1,627                         | 513                | 0.19 (0.18, 0.21)               | Referent               |
| <b>Sick Family Member</b>                       |                               |                    |                                 |                        |
| Yes                                             | 391                           | 126                | 0.23 (0.18, 0.27)               | 1.09 (0.88, 1.33)      |
| No                                              | 1,569                         | 554                | 0.21 (0.19, 0.23)               | Referent               |
| <b>Argued with Partner More Than Usual</b>      |                               |                    |                                 |                        |
| Yes                                             | 429                           | 171                | 0.25 (0.21, 0.29)               | 1.27 (1.05, 1.54)      |
| No                                              | 1,523                         | 506                | 0.20 (0.18, 0.22)               | Referent               |

Table S3 continued.

|                                      |     |       |     |                   |                   |
|--------------------------------------|-----|-------|-----|-------------------|-------------------|
| <b>Partner Didn't Want Pregnancy</b> |     |       |     |                   |                   |
|                                      | Yes | 116   | 44  | 0.18 (0.12, 0.24) | 0.86 (0.60, 1.22) |
|                                      | No  | 1,840 | 632 | 0.21 (0.19, 0.23) | Referent          |
| <b>Intimate Partner Violence</b>     |     |       |     |                   |                   |
|                                      | Yes | 117   | 56  | 0.27 (0.19, 0.35) | 1.29 (0.95, 1.74) |
|                                      | No  | 1,836 | 625 | 0.21 (0.19, 0.23) | Referent          |
| <b>Physical Fight</b>                |     |       |     |                   |                   |
|                                      | Yes | 70    | 34  | 0.24 (0.15, 0.33) | 1.14 (0.76, 1.71) |
|                                      | No  | 1,888 | 647 | 0.21 (0.19, 0.23) | Referent          |

\* Referent category for outcome variable

CI: Confidence interval
