# Supplementary material for: Pre-Birth Household Challenges Predict Future Child’s School Readiness and Academic Achievement
Source: MDPI journal article supplement (doi:10.3390/children9030414), 2022-03-15
Supplement: s1 [file s1]

Table S2. Independent Associations of Pre-Birth Household Challenge Components 12 Months Before Birth of 3-Year-Old Child with 3<sup>rd</sup> Grade PEAKS ELA Evaluation Score

| Pre-Birth Household Challenges                  |     | A/P* (N) | BP/FBP (N) | BP/FBP Weighted Mean (95% CI) | Risk Ratio (95% CI) |
|-------------------------------------------------|-----|----------|------------|-------------------------------|---------------------|
| <b>Moving to a New Address</b>                  |     |          |            |                               |                     |
|                                                 | Yes | 128      | 273        | 0.64 (0.58, 0.70)             | 1.01 (0.91, 1.13)   |
|                                                 | No  | 267      | 594        | 0.63 (0.59, 0.67)             | Referent            |
| <b>Someone Close Had Drug or Drinking Issue</b> |     |          |            |                               |                     |
|                                                 | Yes | 53       | 218        | 0.76 (0.70, 0.83)             | 1.26 (1.14, 1.40)   |
|                                                 | No  | 341      | 648        | 0.60 (0.57, 0.64)             | Referent            |
| <b>Can't Pay Bills</b>                          |     |          |            |                               |                     |
|                                                 | Yes | 62       | 207        | 0.75 (0.68, 0.82)             | 1.24 (1.12, 1.38)   |
|                                                 | No  | 332      | 654        | 0.60 (0.57, 0.64)             | Referent            |
| <b>Mom Lost Job</b>                             |     |          |            |                               |                     |
|                                                 | Yes | 32       | 86         | 0.72 (0.61, 0.83)             | 1.15 (0.97, 1.35)   |
|                                                 | No  | 362      | 773        | 0.63 (0.59, 0.66)             | Referent            |
| <b>Partner Lost Job</b>                         |     |          |            |                               |                     |
|                                                 | Yes | 33       | 105        | 0.72 (0.63, 0.82)             | 1.16 (1.01, 1.33)   |
|                                                 | No  | 362      | 755        | 0.62 (0.59, 0.66)             | Referent            |
| <b>Mental Health Check or Treatment</b>         |     |          |            |                               |                     |
|                                                 | Yes | 32       | 87         | 0.77 (0.68, 0.86)             | 1.23 (1.09, 1.40)   |
|                                                 | No  | 364      | 789        | 0.62 (0.59, 0.66)             | Referent            |
| <b>Homeless</b>                                 |     |          |            |                               |                     |
|                                                 | Yes | 12       | 42         | 0.90 (0.83, 0.97)             | 1.44 (1.32, 1.58)   |
|                                                 | No  | 383      | 824        | 0.62 (0.59, 0.66)             | Referent            |
| <b>Birthing Parent or Partner in Jail</b>       |     |          |            |                               |                     |
|                                                 | Yes | 14       | 62         | 0.79 (0.67, 0.92)             | 1.26 (1.07, 1.49)   |
|                                                 | No  | 380      | 801        | 0.63 (0.59, 0.66)             | Referent            |
| <b>Divorce or Separation</b>                    |     |          |            |                               |                     |
|                                                 | Yes | 22       | 91         | 0.82 (0.73, 0.91)             | 1.33 (1.17, 1.50)   |
|                                                 | No  | 371      | 773        | 0.62 (0.58, 0.65)             | Referent            |
| <b>Death in Family</b>                          |     |          |            |                               |                     |
|                                                 | Yes | 50       | 190        | 0.74 (0.67, 0.81)             | 1.20 (1.08, 1.35)   |
|                                                 | No  | 344      | 674        | 0.61 (0.58, 0.65)             | Referent            |
| <b>Sick Family Member</b>                       |     |          |            |                               |                     |
|                                                 | Yes | 89       | 173        | 0.63 (0.56, 0.70)             | 0.99 (0.88, 1.13)   |
|                                                 | No  | 305      | 692        | 0.64 (0.60, 0.67)             | Referent            |
| <b>Argued with Partner More Than Usual</b>      |     |          |            |                               |                     |
|                                                 | Yes | 63       | 234        | 0.77 (0.70, 0.83)             | 1.28 (1.16, 1.42)   |
|                                                 | No  | 329      | 628        | 0.60 (0.56, 0.64)             | Referent            |

Table S2 continued.

|                                      |     |     |     |                   |                   |
|--------------------------------------|-----|-----|-----|-------------------|-------------------|
| <b>Partner Didn't Want Pregnancy</b> |     |     |     |                   |                   |
|                                      | Yes | 17  | 62  | 0.78 (0.66, 0.90) | 1.24 (1.05, 1.46) |
|                                      | No  | 375 | 804 | 0.63 (0.59, 0.66) | Referent          |
| <b>Intimate Partner Violence</b>     |     |     |     |                   |                   |
|                                      | Yes | 11  | 74  | 0.90 (0.83, 0.98) | 1.46 (1.33, 1.62) |
|                                      | No  | 383 | 789 | 0.62 (0.58, 0.65) | Referent          |
| <b>Physical Fight</b>                |     |     |     |                   |                   |
|                                      | Yes | 6   | 43  | 0.84 (0.69, 0.98) | 1.33 (1.11, 1.60) |
|                                      | No  | 386 | 823 | 0.63 (0.59, 0.66) | Referent          |

\* Referent category for outcome variable

PEAKS: Performance Evaluation for Alaska's Schools Reading Assessment

ELA: English language arts

A/P: Score of Advanced or Proficient on PEAKS

BP/FBP: Score of Below Proficient or Far Below Proficient on PEAKS

CI: Confidence Interval
