# Supplementary material for: Pre-Birth Household Challenges Predict Future Child’s School Readiness and Academic Achievement
Source: MDPI journal article supplement (doi:10.3390/children9030414), 2022-03-15
Supplement: s1 [file s1]

Table S1. Independent Associations of Pre-Birth Household Challenge Components 12 Months Before Birth of 3-Year-Old Child with Child's ADP Goals Met

| Pre-Birth Household Challenges                  |     | $\geq 11^* (N)$ | $< 11 (N)$ | $< 11$ Weighted Mean (95% CI) | Risk Ratio (95% CI) |
|-------------------------------------------------|-----|-----------------|------------|-------------------------------|---------------------|
| <b>Moving to a New Address</b>                  |     |                 |            |                               |                     |
|                                                 | Yes | 221             | 551        | 0.70 (0.66, 0.74)             | 1.01 (0.94, 1.09)   |
|                                                 | No  | 457             | 1150       | 0.69 (0.66, 0.71)             | Referent            |
| <b>Someone Close Had Drug or Drinking Issue</b> |     |                 |            |                               |                     |
|                                                 | Yes | 112             | 362        | 0.74 (0.69, 0.79)             | 1.10 (1.02, 1.19)   |
|                                                 | No  | 568             | 1,336      | 0.68 (0.65, 0.70)             | Referent            |
| <b>Can't Pay Bills</b>                          |     |                 |            |                               |                     |
|                                                 | Yes | 114             | 363        | 0.75 (0.70, 0.80)             | 1.11 (1.03, 1.20)   |
|                                                 | No  | 564             | 1,333      | 0.67 (0.65, 0.70)             | Referent            |
| <b>Birthing Parent Lost Job</b>                 |     |                 |            |                               |                     |
|                                                 | Yes | 48              | 153        | 0.74 (0.66, 0.82)             | 1.08 (0.97, 1.21)   |
|                                                 | No  | 627             | 1,534      | 0.68 (0.66, 0.71)             | Referent            |
| <b>Partner Lost Job</b>                         |     |                 |            |                               |                     |
|                                                 | Yes | 55              | 194        | 0.79 (0.73, 0.85)             | 1.17 (1.07, 1.27)   |
|                                                 | No  | 621             | 1,497      | 0.68 (0.65, 0.70)             | Referent            |
| <b>Mental Health Check or Treatment</b>         |     |                 |            |                               |                     |
|                                                 | Yes | 62              | 162        | 0.73 (0.66, 0.80)             | 1.06 (0.95, 1.17)   |
|                                                 | No  | 618             | 1,560      | 0.69 (0.66, 0.71)             | Referent            |
| <b>Homeless</b>                                 |     |                 |            |                               |                     |
|                                                 | Yes | 19              | 77         | 0.84 (0.75, 0.93)             | 1.23 (1.09, 1.38)   |
|                                                 | No  | 661             | 1,621      | 0.68 (0.66, 0.71)             | Referent            |
| <b>Birthing Parent or Partner in Jail</b>       |     |                 |            |                               |                     |
|                                                 | Yes | 39              | 114        | 0.73 (0.64, 0.82)             | 1.06 (0.93, 1.21)   |
|                                                 | No  | 639             | 1,580      | 0.69 (0.66, 0.71)             | Referent            |
| <b>Divorce or Separation</b>                    |     |                 |            |                               |                     |
|                                                 | Yes | 43              | 156        | 0.79 (0.72, 0.86)             | 1.16 (1.05, 1.28)   |
|                                                 | No  | 636             | 1,540      | 0.68 (0.66, 0.70)             | Referent            |
| <b>Death in Family</b>                          |     |                 |            |                               |                     |
|                                                 | Yes | 105             | 346        | 0.74 (0.69, 0.79)             | 1.09 (1.01, 1.18)   |
|                                                 | No  | 574             | 1,350      | 0.68 (0.65, 0.70)             | Referent            |
| <b>Sick Family Member</b>                       |     |                 |            |                               |                     |
|                                                 | Yes | 121             | 341        | 0.72 (0.67, 0.77)             | 1.06 (0.98, 1.15)   |
|                                                 | No  | 560             | 1,354      | 0.68 (0.65, 0.70)             | Referent            |
| <b>Argued with Partner More Than Usual</b>      |     |                 |            |                               |                     |
|                                                 | Yes | 130             | 406        | 0.74 (0.69, 0.78)             | 1.09 (1.01, 1.18)   |
|                                                 | No  | 545             | 1,284      | 0.68 (0.65, 0.70)             | Referent            |

Table S1 continued.

|                                      |     |     |       |                   |                   |
|--------------------------------------|-----|-----|-------|-------------------|-------------------|
| <b>Partner Didn't Want Pregnancy</b> |     |     |       |                   |                   |
|                                      | Yes | 32  | 115   | 0.76 (0.67, 0.85) | 1.11 (0.99, 1.26) |
|                                      | No  | 644 | 1,577 | 0.68 (0.66, 0.71) | Referent          |
| <b>Intimate Partner Violence</b>     |     |     |       |                   |                   |
|                                      | Yes | 41  | 118   | 0.74 (0.66, 0.82) | 1.08 (0.96, 1.22) |
|                                      | No  | 636 | 1575  | 0.68 (0.66, 0.71) | Referent          |
| <b>Physical Fight</b>                |     |     |       |                   |                   |
|                                      | Yes | 9   | 41    | 0.71 (0.59, 0.83) | 1.03 (0.87, 1.22) |
|                                      | No  | 651 | 1,627 | 0.69 (0.66, 0.71) | Referent          |

\* Referent category for outcome variable

ADP: Alaska Developmental Profile

CI: Confidence Interval
