# Supplementary material for: Pre-Birth Household Challenges Predict Future Child’s School Readiness and Academic Achievement
Source: Children (Basel). 2022 Mar 15;9(3):414. doi: 10.3390/children9030414 (PMC8947585; doi:10.3390/children9030414)
Supplement: Supplementary file 1 [file children-09-00414-s001.zip]

Archive with 4 entries (4 files):
- Figure_S1.pdf
- Table_S1.pdf
- Table_S2.pdf
- Table_S3.pdf
